# Supplementary material
Source: Springer Nature journal article supplement (https://www.springermedizin.de/resource/supplementary/12916_2003_9_MOESM2_ESM.pdf/9599054)
Supplement: MOESM2 [file 9599054]

841 Enrolled

419 Received fascial interposition

422 Did not receive fascial interposition

410 Included in primary analysis population

343 Vasectomy successes

24 Vasectomy failures

12 Received extended follow-up

12 Did not receive extended follow-Up

29 Indeterminate outcome

14 Lost to follow-up

9 Did not return for any semen analyses

416 Included in primary analysis population

331 Vasectomy successes

53 Vasectomy failures

24 Received extended follow-up

29 Did not receive extended follow-up

22 Indeterminate outcome

10 Lost to follow-up

6 Did not return for any semen analyses

399 No protocol violations/exclusions

11 Protocol violations

10 Could not complete vasectomy as assigned

1 Major protocol violation

414 No protocol violations/exclusions

2 Protocol violations

1 Could not complete vasectomy as assigned

1 Major protocol violation
